# Supplementary material for: Recovery Colleges After a Decade of Research: A Literature Review
Source: Atypon-hosted journal article supplement (doi:10.1176/appi.ps.201900352), 2020-05-28

## Online supplement file

### **Key words search strategy for Scopus and Medline**

1. (Recovery college\* OR recovery education\* centre\* OR recovery education\* center\*)  
OR (recovery adj2 education\*). ab, kf, kw, ti.
2. (recovery adj2 education\*). ab,kf,kw,ti.
3. 1 OR 2
4. Limit 3 to (English or French)

Identification

Screening

Eligibility

Included

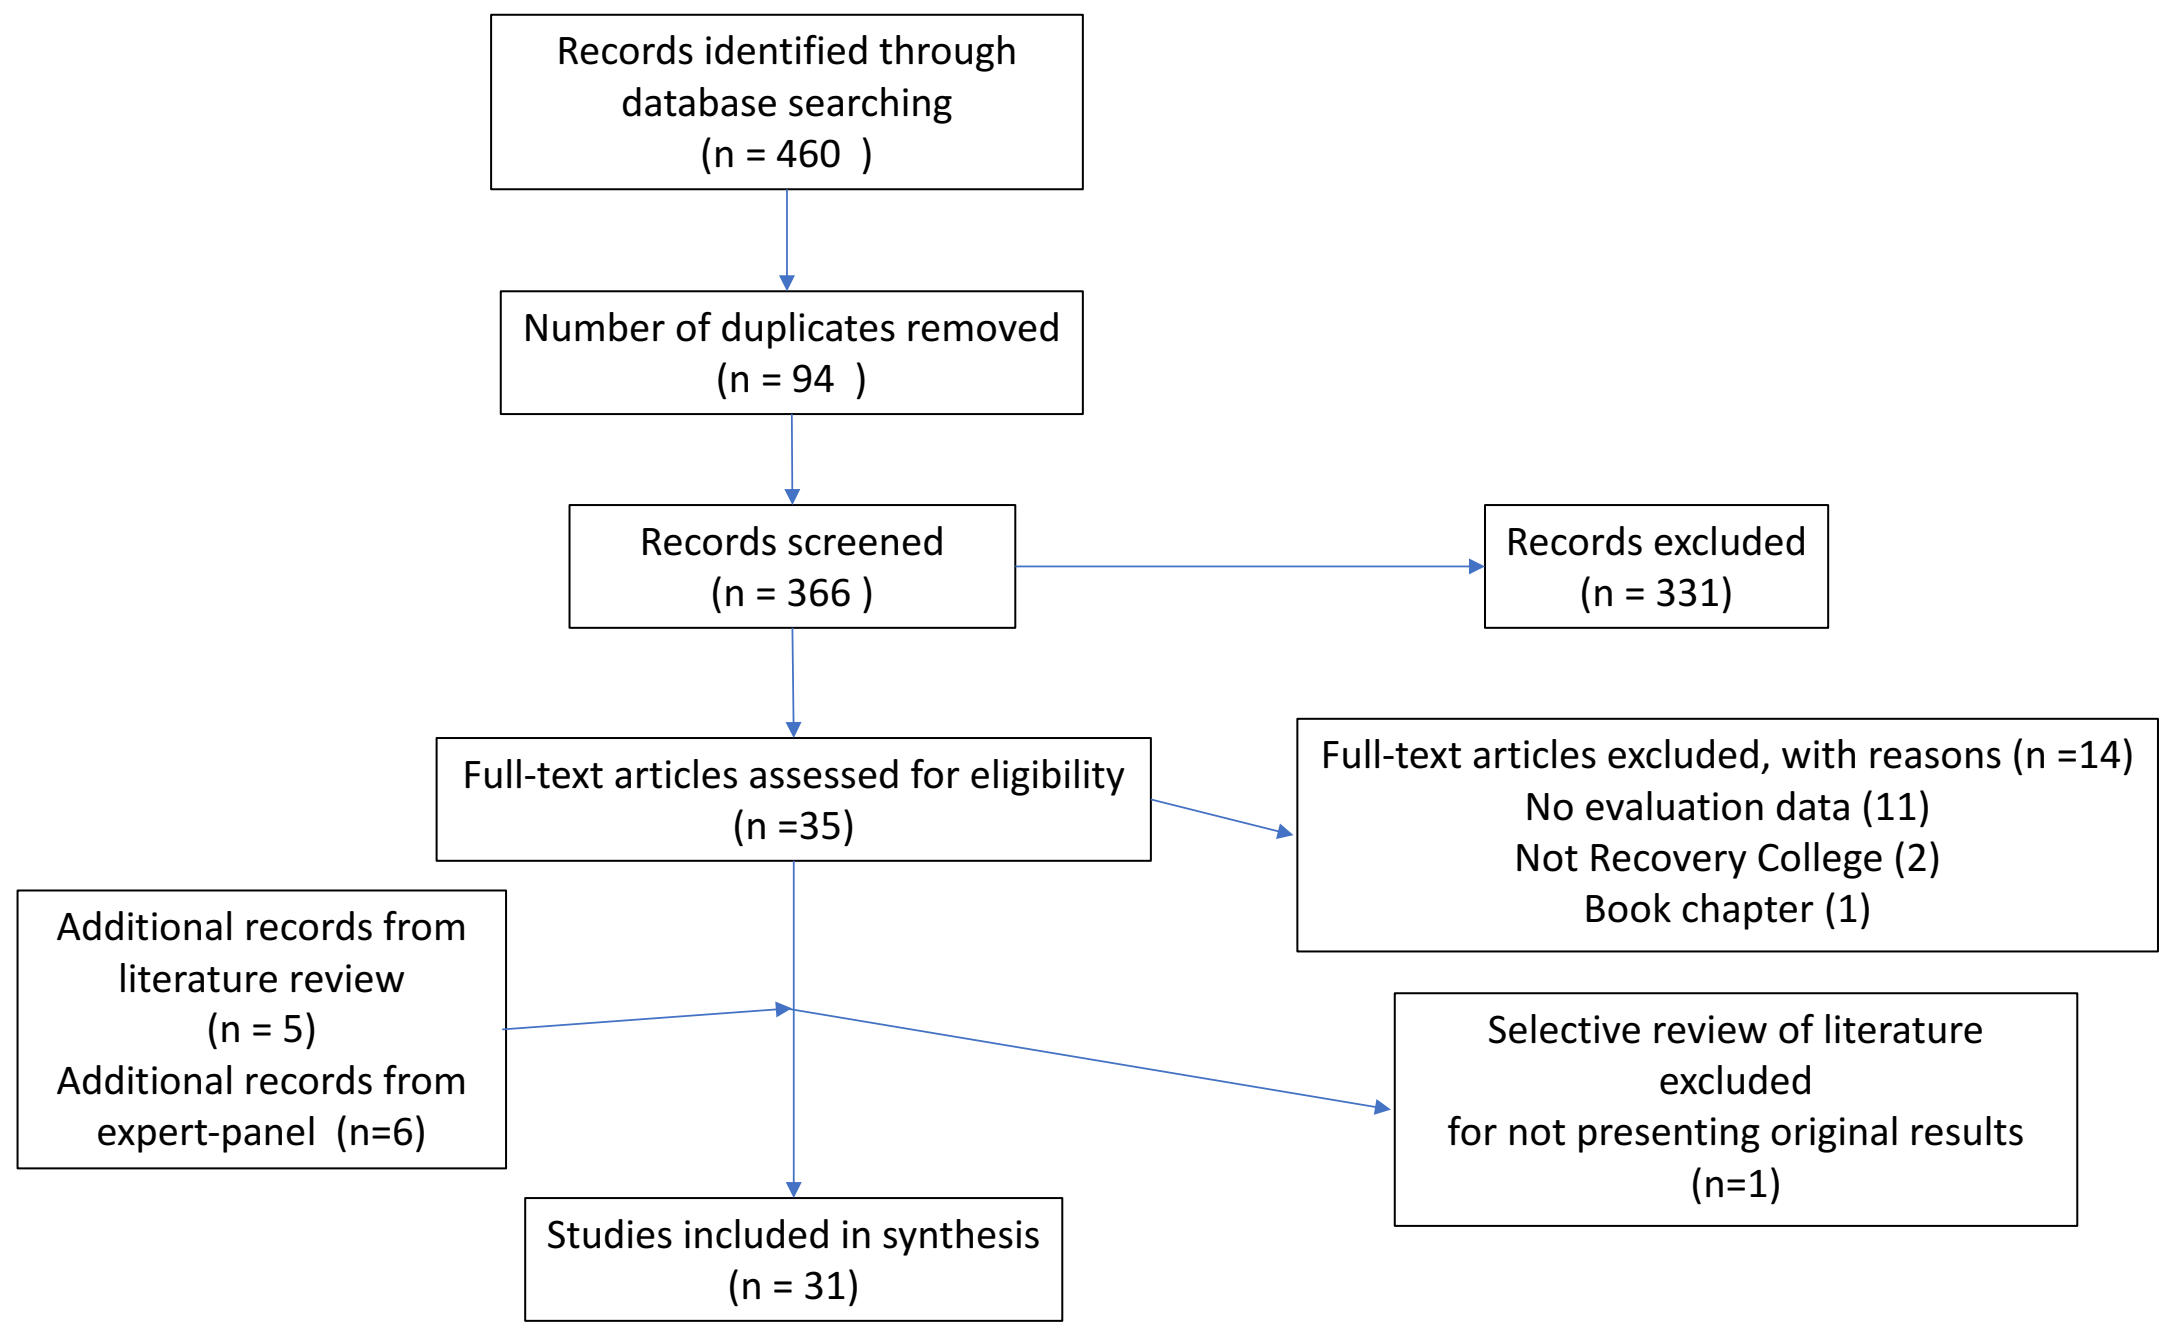

Supplement: appi.ps.201900352.ds001.pdf [file appi.ps.201900352.ds001.pdf]
